# Supplementary material
Source: Springer Nature journal article supplement (https://www.springermedizin.de/resource/supplementary/12943_2013_1161_MOESM3_ESM.pdf/9552632)

A

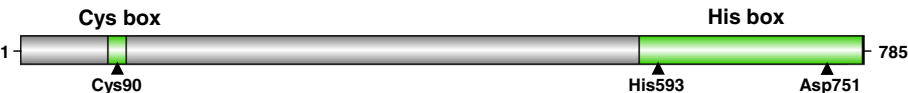

B

### Fanconi anemia pathway

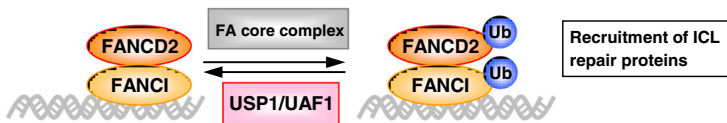

### Translesion synthesis

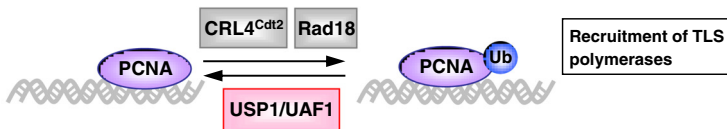

### Cell differentiation (osteosarcoma)

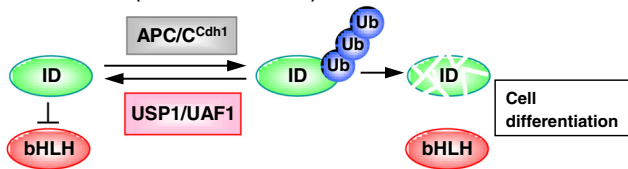

Supplement: MOESM3 [file 9552632]
